# Supplementary material for: A pseudoautosomal glycosylation disorder prompts the revision of dolichol biosynthesis
Source: PubMed Central journal article supplement — Cell. 2024 Jul 11;187(14):3585–3601.e22. doi: 10.1016/j.cell.2024.04.041 (PMC11250103; doi:10.1016/j.cell.2024.04.041), 2024-07-11
Supplement: mmc1.pdf [file mmc1.pdf]

## **Supplemental information**

### **A pseudoautosomal glycosylation disorder prompts the revision of dolichol biosynthesis**

**Matthew P. Wilson, Takfarinas Kentache, Charlotte R. Althoff, Céline Schulz, Geoffroy de Bettignies, Gisèle Mateu Cabrera, Loreta Cimbalistiene, Birute Burnyte, Grace Yoon, Gregory Costain, Sandrine Vuillaumier-Barrot, David Cheillan, Daisy Rymen, Lucie Rychtarova, Hana Hansikova, Marina Bury, Joseph P. Dewulf, Francesco Caligiore, Jaak Jaeken, Vincent Cantagrel, Emile Van Schaftingen, Gert Matthijs, François Foulquier, and Guido T. Bommer**

## Supplemental information

### A pseudoautosomal glycosylation disorder prompts the revision of dolichol biosynthesis

Matthew P. Wilson<sup>1,#</sup>, Takfarinas Kentache<sup>2,3,#</sup>, Charlotte R. Althoff<sup>1,4,#</sup>, Céline Schulz<sup>4</sup>, Geoffroy de Bettignies<sup>4</sup>, Gisèle Mateu-Cabrera<sup>1</sup>, Loreta Cimbalistiene<sup>5</sup>, Birute Burnyte<sup>5</sup>, Grace Yoon<sup>6,7,8</sup>, Gregory Costain<sup>6,8,9,10</sup>, Sandrine Vuillaumier-Barrot<sup>11</sup>, David Cheillan<sup>12</sup>, Daisy Rymen<sup>13</sup>, Lucie Rychtarova<sup>14</sup>, Hana Hansikova<sup>14</sup>, Marina Bury<sup>2,3</sup>, Joseph P. Dewulf<sup>2,3</sup>, Francesco Caligiore<sup>2,3</sup>, Jaak Jaeken<sup>13</sup>, Vincent Cantagrel<sup>15</sup>, Emile Van Schaftingen<sup>2,3,†,\*</sup>, Gert Matthijs<sup>1,†,\*</sup>, François Foulquier<sup>4,†,\*</sup>, Guido T. Bommer<sup>2,3,16,†,\*</sup>

**This file contains:**

**Supplemental Table S1**

**Table S1: *m/z* values used for LCMS analysis of polyisoprenoid species, related to Figures 2-6, Figures S2-6, and Table S2.**

|                                     |                                    | Number of isoprene units |           |           |           |           |           |           |
|-------------------------------------|------------------------------------|--------------------------|-----------|-----------|-----------|-----------|-----------|-----------|
|                                     |                                    | 15                       | 16        | 17        | 18        | 19        | 20        | 21        |
| [M + NH <sub>4</sub> <sup>+</sup> ] | Polyprenal                         | 1054.9678                | 1123.0304 | 1191.093  | 1259.1556 | 1327.2182 | 1395.2808 | 1463.3434 |
|                                     | Polyprenol / Dolichal              | 1056.9834                | 1125.046  | 1193.1086 | 1261.1712 | 1329.2338 | 1397.2964 | 1465.359  |
|                                     | Dolichol                           | 1058.999                 | 1127.0616 | 1195.1224 | 1263.1868 | 1331.2494 | 1399.312  | 1467.3746 |
|                                     | Dolichol M + 2                     | 1061.0057                | 1129.0683 | 1197.1291 | 1265.1935 | 1333.2561 | 1401.3187 | 1469.3813 |
|                                     | Dimethylated Dolichol -Phosphate   | 1166.9966                | 1235.0592 | 1303.1218 | 1371.1844 | 1439.2470 | 1507.3096 | 1575.3722 |
|                                     | Dimethylated Polyprenol -Phosphate | 1164.9810                | 1233.0436 | 1301.1062 | 1369.1688 | 1437.2314 | 1505.2940 | 1573.3566 |
| [M - H <sup>+</sup> ]               | Polyprenoic acid                   | 1051.9215                | 1119.9841 | 1188.0467 | 1256.1093 | 1324.1719 | 1392.2345 | 1460.2971 |
|                                     | Dolichol -P-hexose                 | 1281.9771                | 1350.0397 | 1418.1023 | 1486.1648 | 1554.2274 | 1622.2901 | 1690.3527 |
|                                     | Polyprenol -P-hexose               | 1279.9614                | 1348.0241 | 1416.0866 | 1484.1492 | 1552.2118 | 1620.2744 | 1688.3371 |

Theoretical *m/z* values of [M + NH<sub>4</sub><sup>+</sup>] ions of polyprenal, dolichal, polyprenol, dolichol, dolichol M+2, dimethylated polyprenol-phosphate, and dimethylated dolichol phosphate from species with 15 to 21 isoprene units. The theoretical *m/z* values of polyprenoic acid, polyprenol-P-hexose and dolichol-P-hexose correspond to the [M - H<sup>+</sup>] ions.
