# Supplementary material for: A pseudoautosomal glycosylation disorder prompts the revision of dolichol biosynthesis
Source: PubMed Central journal article supplement — Cell. 2024 Jul 11;187(14):3585–3601.e22. doi: 10.1016/j.cell.2024.04.041 (PMC11250103; doi:10.1016/j.cell.2024.04.041), 2024-07-11
Supplement: mmc3.pdf [file mmc3.pdf]

## Supplemental information

### A pseudoautosomal glycosylation disorder prompts the revision of dolichol biosynthesis

Matthew P. Wilson<sup>1,#</sup>, Takfarinas Kentache<sup>2,3,#</sup>, Charlotte R. Althoff<sup>1,4,#</sup>, Céline Schulz<sup>4</sup>, Geoffroy de Bettignies<sup>4</sup>, Gisèle Mateu-Cabrera<sup>1</sup>, Loreta Cimbalistiene<sup>5</sup>, Birute Burnyte<sup>5</sup>, Grace Yoon<sup>6,7,8</sup>, Gregory Costain<sup>6,8,9,10</sup>, Sandrine Vuillaumier-Barrot<sup>11</sup>, David Cheillan<sup>12</sup>, Daisy Rymen<sup>13</sup>, Lucie Rychtarova<sup>14</sup>, Hana Hansikova<sup>14</sup>, Marina Bury<sup>2,3</sup>, Joseph P. Dewulf<sup>2,3</sup>, Francesco Caligiore<sup>2,3</sup>, Jaak Jaeken<sup>13</sup>, Vincent Cantagrel<sup>15</sup>, Emile Van Schaftingen<sup>2,3,†,\*</sup>, Gert Matthijs<sup>1,†,\*</sup>, François Foulquier<sup>4,†,\*</sup>, Guido T. Bommer<sup>2,3,16,†,\*</sup>

**This file contains:**

**Supplemental Table S3**

**Table S3. Summary of patient-derived cell lines used in this study, related to Table S2 and Figures 1, 2, 3, 6, S1, S2, and S3.**

| Cell type                             | Identifier              | Variant 1                             | Variant 2                             | Literature                     |
|---------------------------------------|-------------------------|---------------------------------------|---------------------------------------|--------------------------------|
| EBV-immortalized lymphoblastoid cells | Control 1               | -                                     | -                                     | -                              |
|                                       | Control 2               | -                                     | -                                     | -                              |
|                                       | Patient 1               | c.541G>T;<br>p.(Val181Phe) (X)        | c.541G>T;<br>p.(Val181Phe) (X)        | This study                     |
|                                       | Patient 3               | c.541G>T;<br>p.(Val181Phe) (X)        | c.643C>T;<br>p.(Leu215Phe) (Y)        | This study                     |
|                                       | Patient 4               | c.541G>T;<br>p.(Val181Phe) (X)        | c.643C>T;<br>p.(Leu215Phe) (Y)        | This study                     |
|                                       | P3/P4 mother            | c.541G>T;<br>p.(Val181Phe) (X)        | -                                     | This study                     |
|                                       | P3/P4 father            | -                                     | c.643C>T;<br>p.(Leu215Phe) (Y)        | This study                     |
|                                       | SRD5A3-CDG              | c.436G>A,<br>p.(Glu146Lys)            | c.436G>A,<br>p.(Glu146Lys)            | Kousal <i>et al.</i> 2019 [S1] |
| Dermal fibroblasts                    | Control 1               | -                                     | -                                     | -                              |
|                                       | Control 2               | -                                     | -                                     | -                              |
|                                       | Patient 1 (DHRSX/Y-CDG) | c.541G>T;<br>p.(Val181Phe) (X)        | c.541G>T;<br>p.(Val181Phe) (X)        | This study                     |
|                                       | Patient 3 (DHRSX/Y-CDG) | c.541G>T;<br>p.(Val181Phe) (X)        | c.643C>T;<br>p.(Leu215Phe) (Y)        | This study                     |
|                                       | SRD5A3-CDG 1            | c.57G>A;<br>p.(Trp19*)                | c.224_225insA;<br>p.(Tyr75*)          | -                              |
|                                       | SRD5A3-CDG 2            | c.320G>A;<br>p.(Trp107*)              | c.320G>A;<br>p.(Trp107*)              | Rymen <i>et al.</i> 2012 [S2]  |
|                                       | SRD5A3-CDG 3            | c.530_531delTG;<br>p.(Val177Alafs*42) | c.530_531delTG;<br>p.(Val177Alafs*42) | Rymen <i>et al.</i> 2012 [S2]  |
|                                       | SRD5A3-CDG 4            | c.79_80insGGAA;<br>p.(Leu27Argfs*45)  | c.79_80insGGAA;<br>p.(Leu27Argfs*45)  | Rymen <i>et al.</i> 2012 [S2]  |
|                                       | SRD5A3-CDG 5            | c.634delT;<br>p.(Trp212Glyfs*46)      | c.634delT;<br>p.(Trp212Glyfs*46)      | Rymen <i>et al.</i> 2012 [S2]  |
|                                       | SRD5A3-CDG 6            | c.57G>A;<br>p.(Trp19*)                | c.57G>A;<br>p.(Trp19*)                | Rymen <i>et al.</i> 2012 [S2]  |

(X) = variant present on the X chromosome; (Y) = variant present on the Y chromosome

**Supplementary references:**

[S1] Kousal, B., Honzík, T., Hansíková, H., Ondrušková, N., Čechová, A., Tesařová, M., Stránecký, V., Meliška, M., Michaelides, M., & Lišková, P. (2019). Review of SRD5A3 Disease-Causing Sequence Variants and Ocular Findings in Steroid 5 $\alpha$ -Reductase Type 3 Congenital Disorder of Glycosylation, and a Detailed New Case. *Folia biologica*, 65(3), 134–141.

[S2] Rymen, D., Keldermans, L., Race, V., Quelhas, D., Snyder, F., Alehan, F., Erol, I., Mübeccel, D., Gokçay, G., Mitchell, G., Matthijs, G., & Jaeken, J. (2012). *SRD5A3-CDG: an important group of dolichol-phosphate synthesis defects* (Vol. 35, pp. S115–S115). Proceedings of the SSIEM 2012.
